# Supplementary material for: Molecular simulation of glycerol-derived triether podands for lithium ion solvation
Source: Royal Society of Chemistry journal article supplement (doi:10.1039/d2cp00646d), 2022-01-01
Supplement: d2cp00646d1.pdf [file d2cp00646d1.pdf]

## *Supporting Information*

# **Molecular Simulation of Glycerol-Derived Triether Podands for Lithium Ion Solvation**

G. D. Barbosa, Jason E. Bara, and C. Heath Turner<sup>†\*</sup>

Department of Chemical and Biological Engineering, The University of Alabama, Tuscaloosa,  
AL 35487

**†Corresponding Author:**  
E-mail: [hturner@eng.ua.edu](mailto:hturner@eng.ua.edu)  
Phone: +1 (205) 348-1733

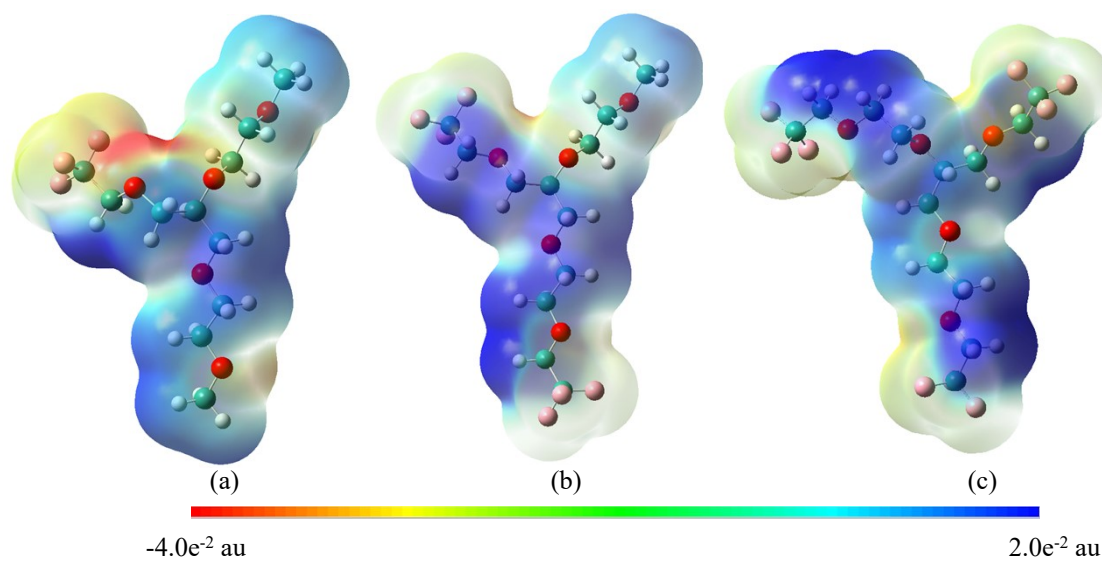

**Figure S1.** Electrostatic surface potential map of (a) TRF1, (b) TRF2, and (c) TRF3. The electrostatic potential is mapped onto the electron density surface with an isovalue of  $0.0004 e^{-}/\text{au}^3$ .

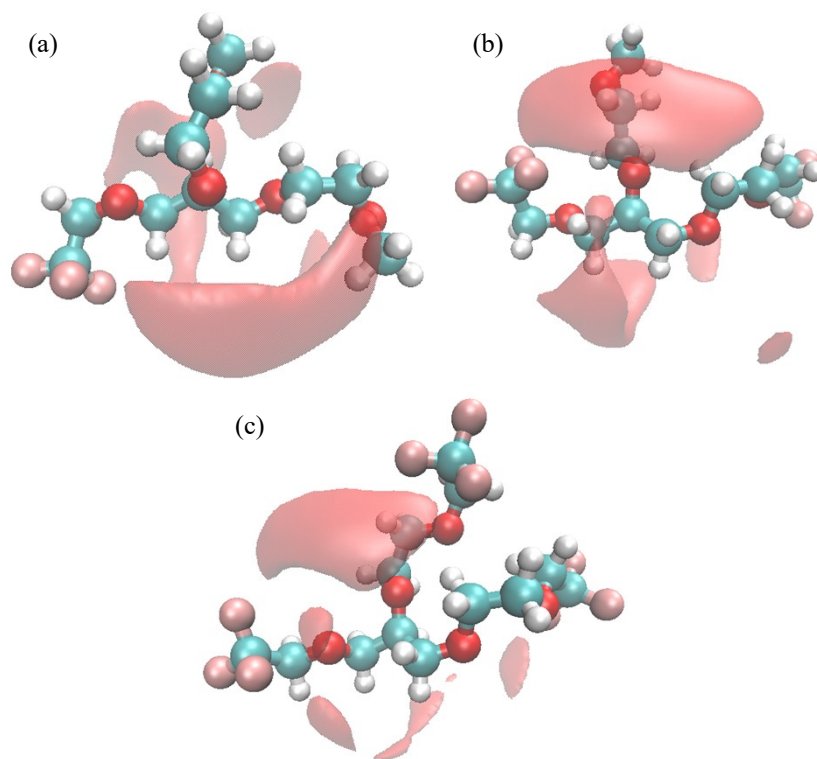

**Figure S2.** Spatial distribution function of oxygen (red isosurface) around (a) TRF1, (b) TRF2, and (c) TRF3 at 298 K. Color code: cyan = carbon; white = hydrogen; pink = fluorine.

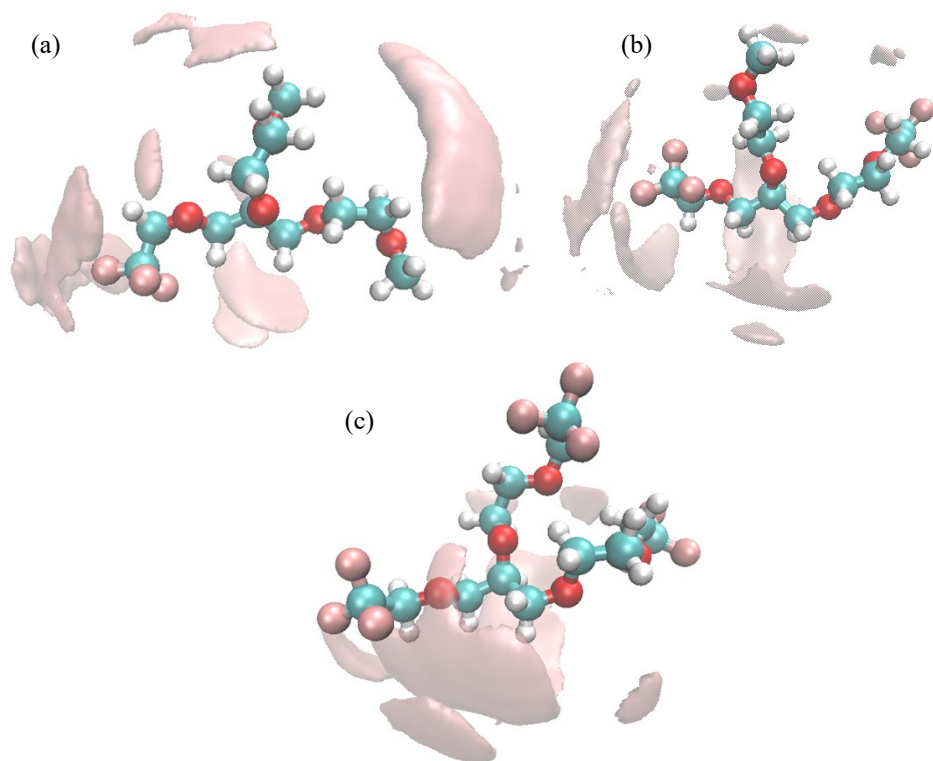

**Figure S3.** Spatial distribution function of fluorine (pink isosurface) around (a) TRF1, (b) TRF2, and (c) TRF3 at 298 K. Color code: cyan = carbon; white = hydrogen; pink = fluorine.

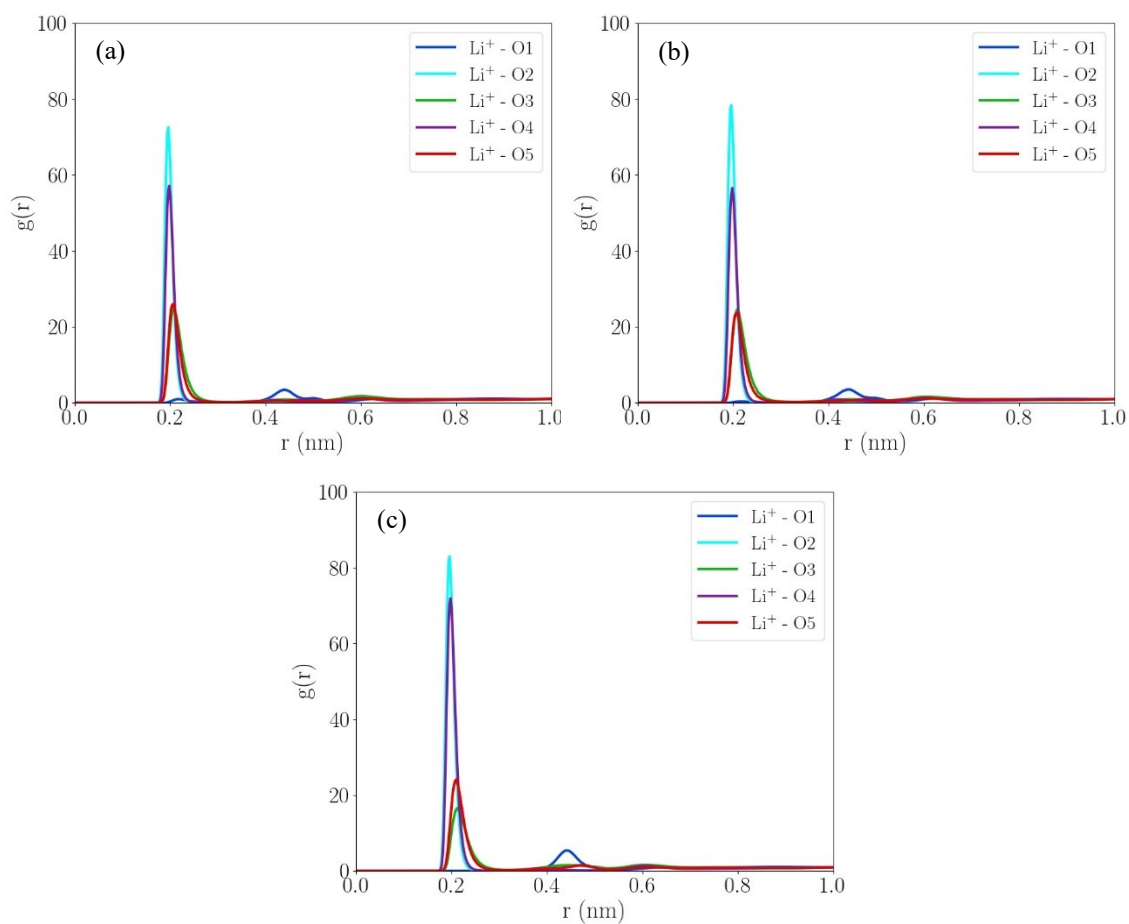

**Figure S4.** RDFs between Li<sup>+</sup> and different oxygen sites of TRF1 for the mixture of 100 LiTf<sub>2</sub>N + solvent at (a) 298 K, (b) 323 K, and (c) 348 K.

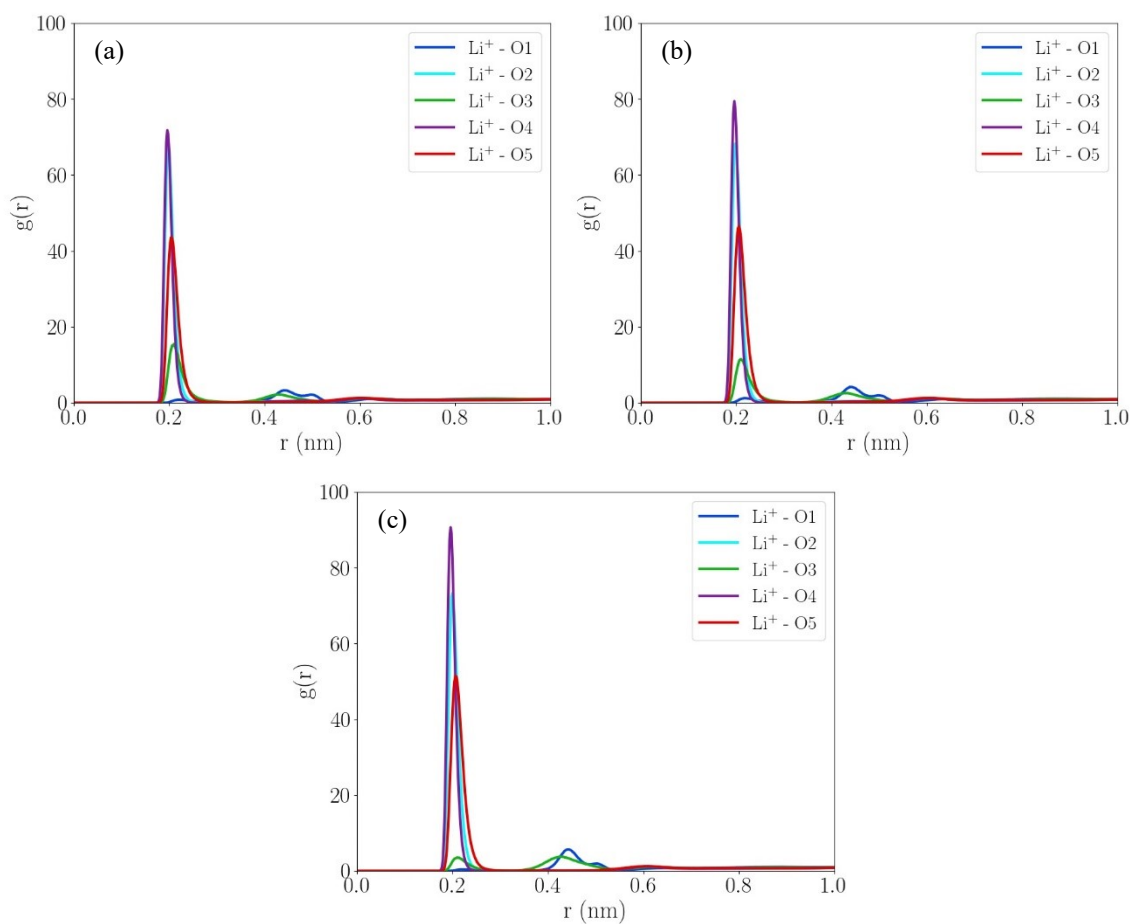

**Figure S5.** RDFs between Li<sup>+</sup> and different oxygen sites of TRF2 for the mixture of 100 LiTf<sub>2</sub>N + solvent at (a) 298 K, (b) 323 K, and (c) 348 K.

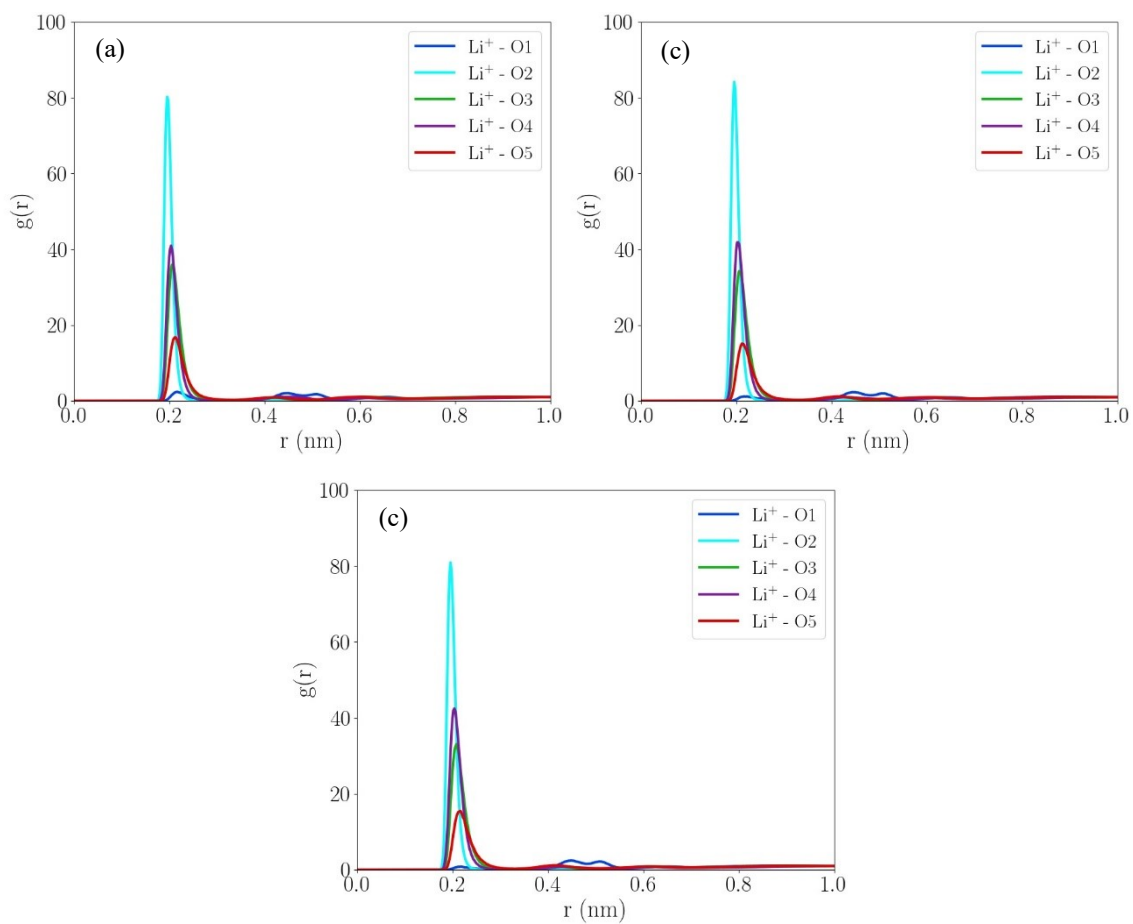

**Figure S6.** RDFs between  $\text{Li}^+$  and different oxygen sites of TRF3 for the mixture of 100  $\text{LiTf}_2\text{N}$  + solvent at (a) 298 K, (b) 323 K, and (c) 348 K.

**Table S1.** Quantitative evaluation of the RDFs between Li<sup>+</sup> and different oxygen sites for the mixture of 100 LiTf2N + solvent:  $r_0$  = most intense peak position;  $g(r_0)$  = RDF value at  $r_0$ ;  $w(r_0)$  = the potential of mean force at  $r_0$ , calculated using  $w(r_0) = -RT \cdot \ln(g(r_0))$ ; and  $N_c$  = coordination number up to 0.4 nm.

| Solvent | Oxygen Site | Temp. (K) | $r_0$ (nm) | $g(r_0)$ | $w(r_0)$ (kJ/mol) | $N_c$ |
|---------|-------------|-----------|------------|----------|-------------------|-------|
| TRF1    | O1          | 298       | 0.44       | 3.46     | -3.078            | 0.165 |
|         |             | 348       | 0.44       | 5.40     | -4.878            | 0.065 |
|         | O2          | 298       | 0.20       | 72.59    | -10.616           | 1.730 |
|         |             | 348       | 0.20       | 83.00    | -12.786           | 1.996 |
|         | O3          | 298       | 0.21       | 24.74    | -7.950            | 1.293 |
|         |             | 348       | 0.21       | 16.53    | -8.116            | 1.111 |
|         | O4          | 298       | 0.20       | 57.13    | -10.023           | 1.393 |
|         |             | 348       | 0.20       | 71.92    | -12.371           | 1.924 |
|         | O5          | 298       | 0.21       | 26.01    | -8.073            | 1.114 |
|         |             | 348       | 0.21       | 24.13    | -9.211            | 1.248 |
| TRF2    | O1          | 298       | 0.44       | 3.26     | -2.930            | 0.160 |
|         |             | 348       | 0.44       | 5.67     | -5.020            | 0.055 |
|         | O2          | 298       | 0.20       | 67.46    | -10.435           | 1.550 |
|         |             | 348       | 0.20       | 73.31    | -12.427           | 1.901 |
|         | O3          | 298       | 0.21       | 15.51    | -6.792            | 0.918 |
|         |             | 348       | 0.43       | 3.78     | -3.845            | 0.411 |
|         | O4          | 298       | 0.20       | 71.81    | -10.590           | 1.422 |
|         |             | 348       | 0.20       | 90.67    | -13.041           | 1.903 |
|         | O5          | 298       | 0.20       | 43.57    | -9.352            | 1.405 |
|         |             | 348       | 0.21       | 51.43    | -11.401           | 1.861 |
| TRF3    | O1          | 298       | 0.22       | 2.37     | -2.136            | 0.233 |
|         |             | 348       | 0.45       | 2.44     | -2.583            | 0.076 |
|         | O2          | 298       | 0.20       | 80.27    | -10.866           | 1.540 |
|         |             | 348       | 0.20       | 80.95    | -12.713           | 1.554 |
|         | O3          | 298       | 0.21       | 35.95    | -8.875            | 1.250 |
|         |             | 348       | 0.21       | 33.06    | -10.122           | 1.296 |
|         | O4          | 298       | 0.20       | 40.98    | -9.200            | 1.181 |
|         |             | 348       | 0.20       | 42.50    | -10.849           | 1.306 |
|         | O5          | 298       | 0.21       | 16.78    | -6.988            | 0.879 |
|         |             | 348       | 0.22       | 15.48    | -7.927            | 0.916 |



**Table S2.** Atomic charges (units of  $e$ ) of the oxygen sites; these charges are obtained by the ChelpG method, as described in the simulation methodology section.

| Solvent | Oxygen Site | Partial charge ( $e$ ) |
|---------|-------------|------------------------|
| TRF1    | O1          | -0.431                 |
|         | O2          | -0.632                 |
|         | O3          | -0.518                 |
|         | O4          | -0.651                 |
|         | O5          | -0.512                 |
| TRF2    | O1          | -0.386                 |
|         | O2          | -0.595                 |
|         | O3          | -0.514                 |
|         | O4          | -0.654                 |
|         | O5          | -0.499                 |
| TRF3    | O1          | -0.358                 |
|         | O2          | -0.584                 |
|         | O3          | 0.512                  |
|         | O4          | -0.498                 |
|         | O5          | -0.404                 |

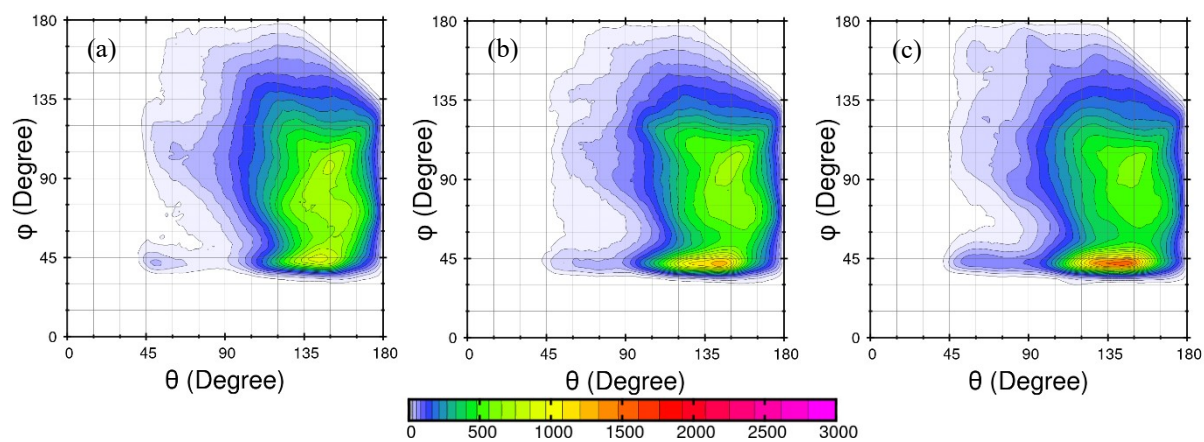

**Figure S7.** Combined distribution functions of the  $\theta$  and  $\phi$  angles of TRF1 at 298 K and 1 bar for the mixture of (a) 100, (b) 200, and (c) 300 LiTf<sub>2</sub>N + solvent. The color scale indicates the number of occurrences that fall within each angle bin.

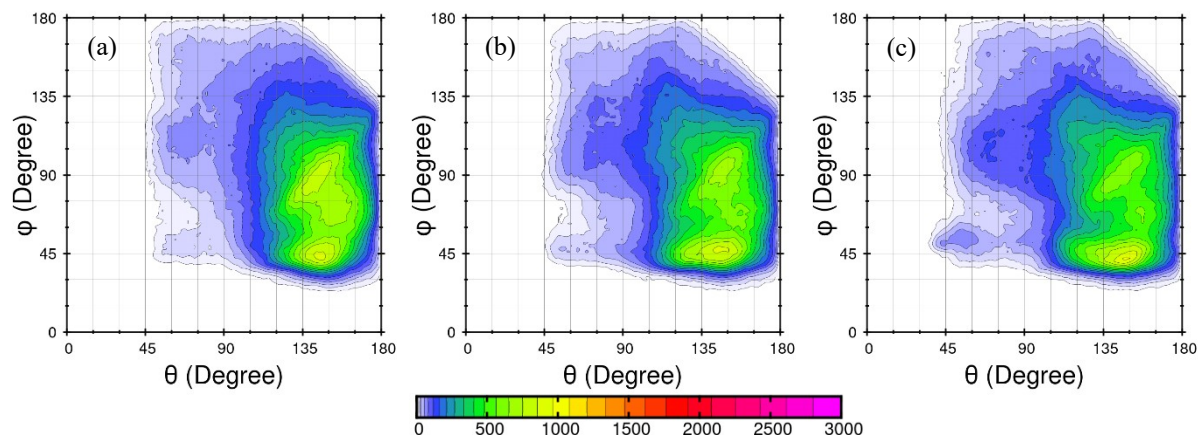

**Figure S8.** Combined distribution function of the  $\theta$  and  $\phi$  angles of TRF2 at 298 K and 1 bar for the mixture of (a) 100, (b) 200, and (c) 300  $\text{LiTf}_2\text{N}$  + solvent. The color scale indicates the number of occurrences that fall within each angle bin.

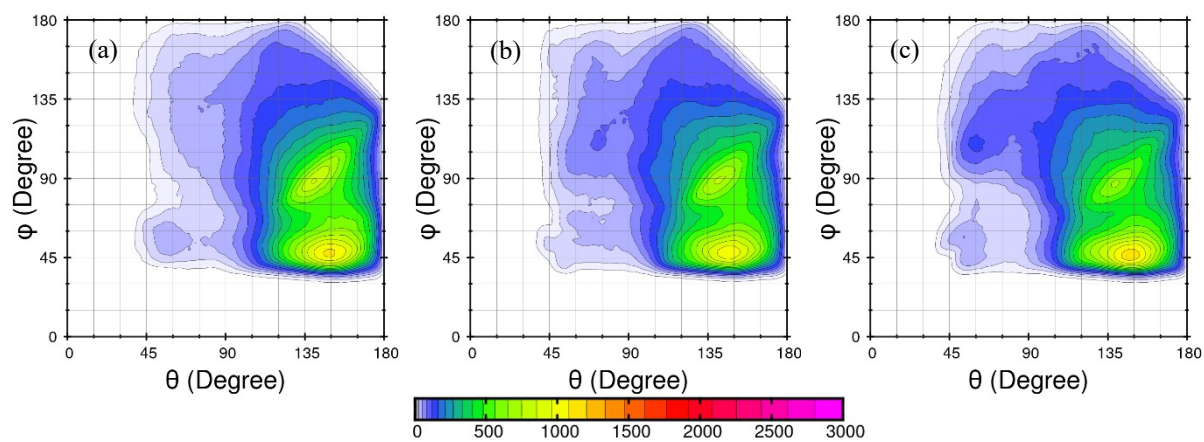

**Figure S9.** Combined distribution function of the  $\theta$  and  $\phi$  angles of TRF3 at 298 K and 1 bar for the mixture of (a) 100, (b) 200, and (c) 300  $\text{LiTf}_2\text{N}$  + solvent. The color scale indicates the number of occurrences that fall within each angle bin.

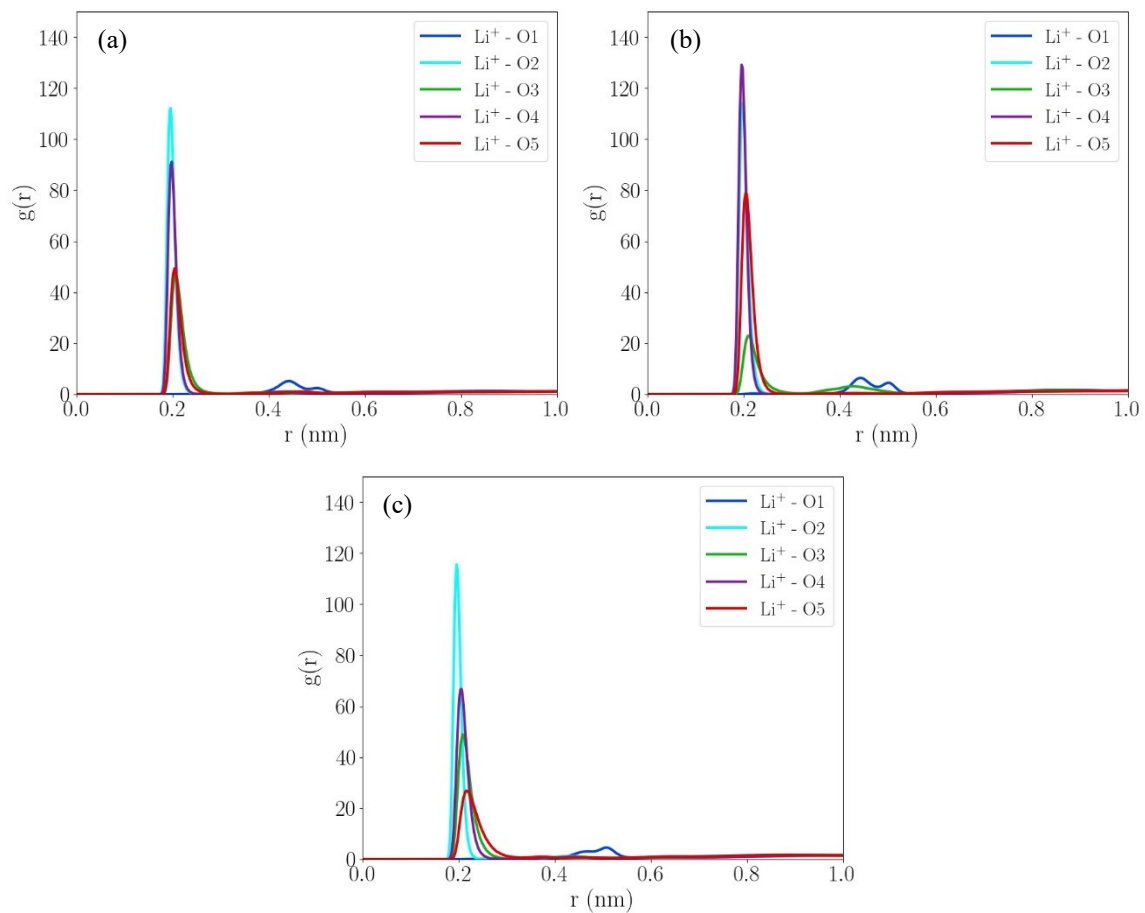

**Figure S10.** RDFs between  $\text{Li}^+$  and different oxygen sites of (a) TRF1, (b) TRF2, and (c) TRF3 for the mixture of 1M  $\text{LiTf}_2\text{N}$  brine + solvent at 298 K and 1 bar.

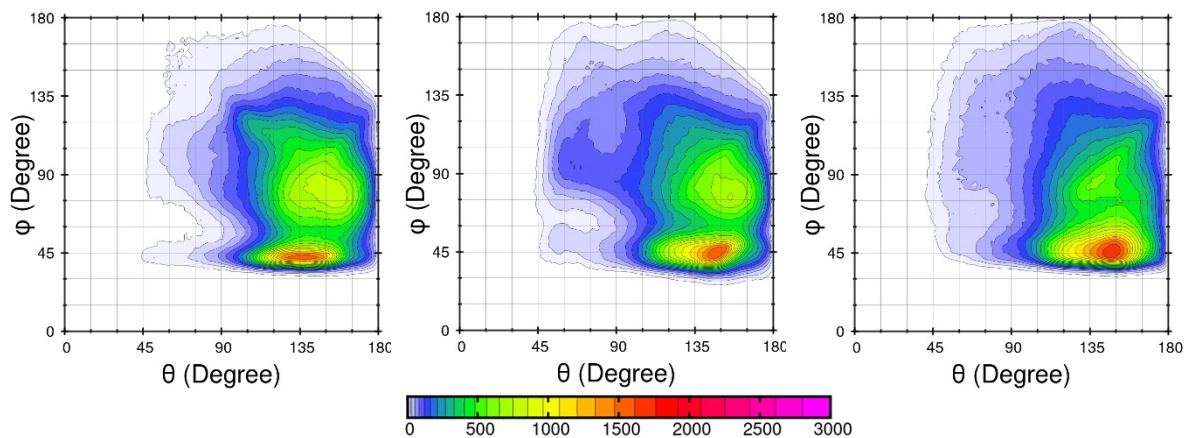

**Figure S11.** Combined distribution function of the  $\theta$  and  $\phi$  angles of (a) TRF1, (b) TRF2 and (c) TRF3 at 298 K and 1 bar for the mixture of  $\text{LiTf}_2\text{N}$  1M brine + solvent. The color scale indicates the number of occurrences that fall within each angle bin.
